# Supplementary material for: Contaminant Risk and Social Vulnerability Associated with Crustacean Shellfish Harvest in the Highly Urbanized San Diego Bay, USA
Source: MDPI journal article supplement (doi:10.3390/environments10060091), 2023-05-23
Supplement: s1 [file s1]

## San Diego Bay Shellfish Consumption Study - Verbal questionnaire

Administer survey after verbal consent has been given.

|             |           |
|-------------|-----------|
| Date:       |           |
| Site:       |           |
| Start time: | End time: |
| Researcher  |           |

A. Participant Language: \_\_\_\_\_

B. Participant gender:

|         |      |        |        |
|---------|------|--------|--------|
| Gender: | Male | Female | Other: |
|---------|------|--------|--------|

### Survey questions

1. Have we talked to you before about what shellfish you catch and how you prepare them? (circle one)

|    |                               |                     |                        |                                |            |
|----|-------------------------------|---------------------|------------------------|--------------------------------|------------|
| No | Yes, within the past 3 months | Yes, 4-6 months ago | Yes, over 6 months ago | Yes, but I can't remember when | Don't know |
|----|-------------------------------|---------------------|------------------------|--------------------------------|------------|

Notes:

2. In which season(s) do you fish for shellfish in San Diego Bay, and how often within season(s)? (circle one for each season stated)

|        |       |               |        |              |                        |                    |                            |
|--------|-------|---------------|--------|--------------|------------------------|--------------------|----------------------------|
| Spring | Daily | few days/week | Weekly | 1-2 x /month | 1-few times per season | 1-2 times per year | less frequently than 1x/yr |
| Summer | Daily | few days/week | Weekly | 1-2 x /month | 1-few times per season | 1-2 times per year | less frequently than 1x/yr |
| Winter | Daily | few days/week | Weekly | 1-2 x /month | 1-few times per season | 1-2 times per year | less frequently than 1x/yr |
| Fall   | Daily | few days/week | Weekly | 1-2 x /month | 1-few times per season | 1-2 times per year | less frequently than 1x/yr |

Notes:

3. Why do you fish in the bay? Choose all that apply

|                    |                        |                |      |                   |                  |        |
|--------------------|------------------------|----------------|------|-------------------|------------------|--------|
| food (subsistence) | food (not subsistence) | fun/recreation | bait | cultural practice | family tradition | other: |
|--------------------|------------------------|----------------|------|-------------------|------------------|--------|

Notes:

**4. Which species of shellfish do you try to catch or have your recently caught for food? (open answer, list all)**

Answer:

**5. How many of these shellfish do you generally keep to eat? (range of numbers)**

Answer:

**6. If eaten, how are they prepared ? (open answer. should be a mix of how prepped & how cooked; e.g., boiled whole, raw shucked, fried shelled)**

Answer:

**7. What parts do you generally eat (open answer, e.g., whole, claws, meat, organs, liquid)?**

Answer:

**8. How do you ethnically identify? (open answer)**

Answer:

**9. Home zip code ? (open answer)**

Answer:

**10. What year were you born? (open answer)**

Answer:

**11. Do you mind if we look in your bucket/bag/cooler to see which species you have caught?  
(show person our field guide of species; complete the table)**

| species/type                     |                                            | Traps or<br>pots | Hand-<br>lining | Digging       | Prying        | Other:        |
|----------------------------------|--------------------------------------------|------------------|-----------------|---------------|---------------|---------------|
|                                  | Genus species                              | no.<br>caught    | no.<br>caught   | no.<br>caught | no.<br>caught | no.<br>caught |
| red rock crab                    | <i>Cancer productus</i>                    |                  |                 |               |               |               |
| yellow rock crab                 | <i>Metacarcinus anthonyi</i>               |                  |                 |               |               |               |
| brown rock crab                  | <i>Romaleon antennarium</i>                |                  |                 |               |               |               |
| sheepcrab                        | <i>Loxorhynchus grandis</i>                |                  |                 |               |               |               |
| swimmer crab                     | <i>Callinectes arcuatus</i>                |                  |                 |               |               |               |
| swimming crab                    | <i>Portunus xantusii</i>                   |                  |                 |               |               |               |
| spiny lobster                    | <i>Panulirus interruptus</i>               |                  |                 |               |               |               |
| mantis shrimp *do not<br>touch!* | <i>Hemisquilla californiensis</i>          |                  |                 |               |               |               |
| ghost shrimp                     | <i>Callinassa californiensis</i>           |                  |                 |               |               |               |
| mud shrimp                       | <i>Upogebia pugettensis</i>                |                  |                 |               |               |               |
| tuna crab                        | <i>Pleuroncodes planipes</i>               |                  |                 |               |               |               |
| Pacific oyster                   | <i>Crassostrea gigas</i>                   |                  |                 |               |               |               |
| Olympia oyster                   | <i>Ostrea lurida</i>                       |                  |                 |               |               |               |
| Mediterranean mussel             | <i>Mytilus galloprovincialis</i>           |                  |                 |               |               |               |
| blue mussel                      | <i>Mytilus edulis</i>                      |                  |                 |               |               |               |
| California mussel                | <i>Mytilus californianus</i>               |                  |                 |               |               |               |
| Red sea urchin                   | <i>Strongylocentrotus<br/>franciscanus</i> |                  |                 |               |               |               |
| Others:                          |                                            |                  |                 |               |               |               |
|                                  |                                            |                  |                 |               |               |               |
|                                  |                                            |                  |                 |               |               |               |
|                                  |                                            |                  |                 |               |               |               |
|                                  |                                            |                  |                 |               |               |               |
